# Supplementary material
Source: ML conference proceedings conference paper supplement (https://proceedings.mlr.press/v97/kim19d.html)
Supplement: Supplementary file 1 [file kim19d-supp.pdf]

---

# Contextual Multi-armed Bandit Algorithm for Semiparametric Reward Model: Supplementary Material

---

Gi-Soo Kim<sup>1</sup> Myunghee Cho Paik<sup>1</sup>

## A. Preliminaries

**Lemma A.1.** (Lemma 11 of *Abbasi-Yadkori et al., 2011*) Let  $\{X_t\}_{t=1}^T$  be a sequence in  $\mathbb{R}^d$  with  $\|X_t\|_2 \leq 1$ ,  $Q$  a  $d \times d$  positive definite matrix with  $\det(Q) \geq 1$  and  $A(t) = \sum_{\tau=1}^{t-1} X_\tau X_\tau^T$ . Then, we have

$$\sum_{t=1}^T X_t^T \{Q + A(t)\}^{-1} X_t \leq 2 \log \left( \frac{\det(Q + A(T+1))}{\det(Q)} \right).$$

**Lemma A.2.** (Lemma 2.1 of *Bercu and Touati, 2008*) Let  $x$  be a square integrable random variable with mean 0 and variance  $\sigma^2 > 0$ . Then,

$$\mathbb{E} \left[ \exp \left( x - \frac{1}{2} x^2 - \frac{1}{2} \sigma^2 \right) \right] \leq 1.$$

**Lemma A.3.** (Lemma 7 of *de la Peña et al., 2009*) Let  $X_\tau \in \mathbb{R}^d$  be  $\mathcal{F}_\tau$ -measurable for some filtration  $\{\mathcal{F}_\tau\}_{\tau=1}^t$ ,  $\mathbb{E}[X_\tau | \mathcal{F}_{\tau-1}] = 0$ , and  $\|X_\tau\|_2 \leq B$  for some constant  $B$ ,  $\tau = 1, \dots, t$ . Let  $c_\tau \in \mathbb{R}$  be  $\mathcal{F}_\tau$ -measurable,  $|c_\tau| \leq 1$  and  $X_\tau \perp c_\tau | \mathcal{F}_{\tau-1}$ . Then for any  $\lambda \in \mathbb{R}^d$ ,

$$\mathbb{E} \left[ \exp \left\{ \lambda^T \sum_{\tau=1}^t X_\tau c_\tau - \frac{1}{2} \lambda^T \left( \sum_{\tau=1}^t X_\tau X_\tau^T + \sum_{\tau=1}^t \mathbb{E}[X_\tau X_\tau^T | \mathcal{F}_{\tau-1}] \right) \lambda \right\} \right] \leq 1.$$

*Proof.* Taking  $x = \lambda^T X_\tau c_\tau$ , we have from Lemma A.2,

$$\mathbb{E} \left[ \exp \left\{ \lambda^T X_\tau c_\tau - \frac{1}{2} \lambda^T \left( c_\tau^2 X_\tau X_\tau^T + \mathbb{E}[c_\tau^2 X_\tau X_\tau^T | \mathcal{F}_{\tau-1}] \right) \lambda \right\} \middle| \mathcal{F}_{\tau-1} \right] \leq 1.$$

Since  $c_\tau^2 \leq 1$  and  $X_\tau X_\tau^T$  is positive semi-definite,

$$\mathbb{E} \left[ \exp \left\{ \lambda^T X_\tau c_\tau - \frac{1}{2} \lambda^T \left( X_\tau X_\tau^T + \mathbb{E}[X_\tau X_\tau^T | \mathcal{F}_{\tau-1}] \right) \lambda \right\} \middle| \mathcal{F}_{\tau-1} \right] \leq 1.$$

□

**Lemma A.4.** (*Abramowitz and Stegun, 1964*) If  $Z \sim \mathcal{N}(m, \sigma^2)$ , for any  $z \geq 1$ ,

$$\frac{1}{2\sqrt{\pi}z} \exp \left( -\frac{z^2}{2} \right) \leq \mathbb{P}(|Z - m| > z\sigma) \leq \frac{1}{\sqrt{\pi}z} \exp \left( -\frac{z^2}{2} \right).$$

## B. Proof of Theorem 4.2

The proof of Theorem 4.2 follows the proof sketch of Section 4.2.

---

<sup>1</sup>Department of Statistics, Seoul National University, Seoul, Korea. Correspondence to: Myunghee Cho Paik <myunghee-chopaik@snu.ac.kr>.

**B.1. Proof of (14)**

Take  $c_\tau = \left(\frac{\nu(\tau) + \bar{b}(\tau)^T \mu}{2}\right)$ . Since  $\mathbb{E}[X_\tau | \mathcal{F}_{\tau-1}] = 0$ ,  $|c_\tau| \leq 1$ , and  $X_\tau \perp c_\tau | \mathcal{F}_{\tau-1}$ , we can apply Lemma A.3, i.e., for any  $\lambda \in \mathbb{R}^d$ ,

$$\mathbb{E}\left[\exp\left\{\lambda^T \sum_{\tau=1}^{t-1} X_\tau c_\tau - \frac{1}{2} \lambda^T \left(\sum_{\tau=1}^{t-1} X_\tau X_\tau^T + \sum_{\tau=1}^{t-1} \mathbb{E}[X_\tau X_\tau^T | \mathcal{F}_{\tau-1}]\right) \lambda\right\}\right] \leq 1.$$

**B.2. Proof of Lemma 4.4**

By Lemma A.3, for any  $\lambda \in \mathbb{R}^d$ ,

$$\mathbb{E}\left[\exp\left\{\lambda^T \sum_{\tau=1}^{t-1} \frac{1}{\sqrt{2}} Y_\tau - \frac{1}{2} \lambda^T \left(\frac{1}{2} \sum_{\tau=1}^{t-1} Y_\tau Y_\tau^T + \frac{1}{2} \sum_{\tau=1}^{t-1} \mathbb{E}[Y_\tau Y_\tau^T | \mathcal{F}_{\tau-1}]\right) \lambda\right\}\right] \leq 1.$$

Here,

$$\begin{aligned} \lambda^T Y_\tau Y_\tau^T \lambda &= \lambda^T D(\tau) \mu \mu^T D(\tau) \lambda \\ &= \{(D(\tau) \lambda)^T \mu\}^2 \\ &\leq \mu^T \mu (D(\tau) \lambda)^T (D(\tau) \lambda) \quad (\because \text{Cauchy-Schwarz inequality}) \\ &\leq (D(\tau) \lambda)^T (D(\tau) \lambda) = \lambda^T D(\tau)^2 \lambda, \end{aligned} \tag{1}$$

and

$$\lambda^T \mathbb{E}[Y_\tau Y_\tau^T | \mathcal{F}_{\tau-1}] \lambda \leq \lambda^T \mathbb{E}[D(\tau)^2 | \mathcal{F}_{\tau-1}] \lambda. \tag{2}$$

Let  $L = X_\tau X_\tau^T$  and  $K = \mathbb{E}[X_\tau X_\tau^T | \mathcal{F}_{\tau-1}]$ . Then,

$$\begin{aligned} \lambda^T D(\tau)^2 \lambda &= \lambda^T (L - K)^2 \lambda \\ &= \lambda^T L^2 \lambda + \lambda^T K^2 \lambda + 2\lambda^T L(-K) \lambda \\ &\leq \lambda^T L^2 \lambda + \lambda^T K^2 \lambda + 2\sqrt{\lambda^T L^2 \lambda \lambda^T K^2 \lambda} \quad (\because \text{Cauchy-Schwarz inequality}) \\ &\leq 2\lambda^T L^2 \lambda + 2\lambda^T K^2 \lambda. \end{aligned} \tag{3}$$

Also,

$$\begin{aligned} \mathbb{E}[D(\tau)^2 | \mathcal{F}_{\tau-1}] &= \mathbb{E}[(L - K)^2 | \mathcal{F}_{\tau-1}] \\ &= \mathbb{E}[L^2 | \mathcal{F}_{\tau-1}] - \mathbb{E}[L | \mathcal{F}_{\tau-1}] K - K \mathbb{E}[L | \mathcal{F}_{\tau-1}] + K^2 \\ &= \mathbb{E}[L^2 | \mathcal{F}_{\tau-1}] - K^2 \quad (\because \mathbb{E}[L | \mathcal{F}_{\tau-1}] = K) \\ \Rightarrow \lambda^T \mathbb{E}[D(\tau)^2 | \mathcal{F}_{\tau-1}] \lambda &\leq 2\lambda^T \mathbb{E}[D(\tau)^2 | \mathcal{F}_{\tau-1}] \lambda \\ &= 2\lambda^T \mathbb{E}[L^2 | \mathcal{F}_{\tau-1}] \lambda - 2\lambda^T K^2 \lambda. \end{aligned} \tag{4}$$

Due to (1), (2), (3) and (4),

$$\begin{aligned} \lambda^T \left(Y_\tau Y_\tau^T + \mathbb{E}[Y_\tau Y_\tau^T | \mathcal{F}_{\tau-1}]\right) \lambda &\leq 2\lambda^T \left(L^2 + \mathbb{E}[L^2 | \mathcal{F}_{\tau-1}]\right) \lambda \\ &\leq 2\lambda^T \left(X_\tau X_\tau^T + \mathbb{E}[X_\tau X_\tau^T | \mathcal{F}_{\tau-1}]\right) \lambda, \end{aligned}$$

where the last inequality is due to  $L = X_\tau X_\tau^T$  and  $X_\tau^T X_\tau \leq 1$ . Therefore, for any  $\lambda \in \mathbb{R}^d$ ,

$$\mathbb{E}\left[\exp\left\{\lambda^T \sum_{\tau=1}^{t-1} \frac{1}{\sqrt{2}} Y_\tau - \frac{1}{2} \lambda^T \left(\sum_{\tau=1}^{t-1} X_\tau X_\tau^T + \sum_{\tau=1}^{t-1} \mathbb{E}[X_\tau X_\tau^T | \mathcal{F}_{\tau-1}]\right) \lambda\right\}\right]$$

$$\begin{aligned} &\leq \mathbb{E} \left[ \exp \left\{ \lambda^T \sum_{\tau=1}^{t-1} \frac{1}{\sqrt{2}} Y_\tau - \frac{1}{2} \lambda^T \left( \frac{1}{2} \sum_{\tau=1}^{t-1} Y_\tau Y_\tau^T + \frac{1}{2} \sum_{\tau=1}^{t-1} \mathbb{E}[Y_\tau Y_\tau^T | \mathcal{F}_{\tau-1}] \right) \lambda \right\} \right] \\ &\leq 1. \end{aligned}$$

### C. Proof of Theorem 4.1

The proof of Theorem 4.1 follows the lines of [Agrawal and Goyal \(2013\)](#) with some modifications. We present the whole proof.

- (a) The first stage is the derivation of a high-probability upper bound of  $|(b_i(t) - \bar{b}(t))^T (\hat{\mu}(t) - \mu)|$ . This is done in Theorem 4.2, which we restate here for concreteness.

**Theorem C.1.** *Let the event  $E^{\hat{\mu}}(t)$  be defined as follows:*

$$E^{\hat{\mu}}(t) = \{ \forall i : |(b_i(t) - \bar{b}(t))^T (\hat{\mu}(t) - \mu)| \leq l(t) s_{t,i}^c \},$$

where  $s_{t,i}^c = \sqrt{(b_i(t) - \bar{b}(t))^T B(t)^{-1} (b_i(t) - \bar{b}(t))}$  and  $l(t) = (2R + 6) \sqrt{d \log(6t^3/\delta)} + 1$ . Then for all  $t \geq 1$ , for any  $0 < \delta < 1$ ,  $\mathbb{P}(E^{\hat{\mu}}(t)) \geq 1 - \frac{\delta}{t^2}$ .

- (b) We next establish a high-probability upper bound for  $|(b_i(t) - \bar{b}(t))^T (\tilde{\mu}(t) - \hat{\mu}(t))|$  in the following Proposition C.2. The proof is a simple extension of [Agrawal and Goyal \(2013\)](#), which uses Lemma A.4 for gaussian random variables.

**Proposition C.2.** *Let the event  $E^{\tilde{\mu}}(t)$  be defined as follows:*

$$E^{\tilde{\mu}}(t) = \{ \forall i : |(b_i(t) - \bar{b}(t))^T (\tilde{\mu}(t) - \hat{\mu}(t))| \leq m(T) s_{t,i}^c \},$$

where  $m(T) = v \sqrt{4d \log(Td)}$ . Then for all  $t \geq 0$ ,  $\mathbb{P}(E^{\tilde{\mu}}(t) | \mathcal{F}_{t-1}) \geq 1 - \frac{1}{T^2}$ .

*Proof.* Note that given  $\mathcal{F}_{t-1}$ , the values of  $(b_i(t) - \bar{b}(t))$ ,  $B(t)$  and  $\hat{\mu}(t)$  are fixed. Then,

$$\begin{aligned} |b_i^c(t)^T (\tilde{\mu}(t) - \hat{\mu}(t))| &= |b_i^c(t)^T v B(t)^{-1/2} \frac{1}{v} B(t)^{1/2} (\tilde{\mu}(t) - \hat{\mu}(t))| \\ &\leq v \sqrt{b_i^c(t)^T B(t)^{-1} b_i^c(t)} \left\| \frac{1}{v} B(t)^{1/2} (\tilde{\mu}(t) - \hat{\mu}(t)) \right\|_2 \\ &= v s_{t,i}^c \left\| \frac{1}{v} B(t)^{1/2} (\tilde{\mu}(t) - \hat{\mu}(t)) \right\|_2 \\ &= v s_{t,i}^c \sqrt{\sum_{j=1}^d \|Z_j(t)\|_2^2}, \end{aligned}$$

where  $Z_j(t) | \mathcal{F}_{t-1} \stackrel{i.i.d.}{\sim} \mathcal{N}(0, 1)$  and the first inequality is due to Cauchy-Schwarz inequality. Due to Lemma A.4, for fixed  $j$  and  $z \geq 1$ ,

$$\mathbb{P}(|Z_j(t)| > z | \mathcal{F}_{t-1}) \leq \frac{1}{\sqrt{\pi} z} \exp\left(-\frac{z^2}{2}\right) \leq \exp\left(-\frac{z^2}{2}\right).$$

Setting  $\exp(-z^2/2) = \frac{1}{dT^2}$ , we have  $z = \sqrt{2 \log(dT^2)} \leq \sqrt{2 \log(d^2 T^2)} = \sqrt{4 \log(dT)}$ . Hence,

$$\begin{aligned} \mathbb{P}(|Z_j(t)| > \sqrt{4 \log(dT)} | \mathcal{F}_{t-1}) &\leq \frac{1}{dT^2} \\ \Rightarrow \mathbb{P}(\forall j : |Z_j(t)| > \sqrt{4 \log(dT)} | \mathcal{F}_{t-1}) &\leq \frac{1}{T^2}. \end{aligned}$$

Thus, with probability at least  $1 - \frac{1}{T^2}$ , for all  $i = 1, \dots, N$ ,

$$|(b_i(t) - \bar{b}(t))^T (\tilde{\mu}(t) - \hat{\mu}(t))| \leq v s_{t,i}^c \sqrt{4 \log(dT)} = m(T) s_{t,i}^c.$$

□

(c) Before proceeding, we divide the arms at each time into two groups: saturated and unsaturated arms. Let  $g(T) = m(T) + l(T)$ . An arm  $i$  is saturated at time  $t$  if

$$(b_i(t) - \bar{b}(t))^T \mu + g(T) s_{t,i}^c < (b_{a^*(t)}(t) - \bar{b}(t))^T \mu,$$

and unsaturated otherwise. Note that the optimal arm  $a^*(t)$  is unsaturated. Note also that from Stage (a) and Stage (b),  $(b_i(t) - \bar{b}(t))^T \mu + g(T) s_{t,i}^c$  is an upper bound of  $(b_i(t) - \bar{b}(t))^T \tilde{\mu}(t)$ . Hence by definition, the saturated arms are the arms that have quite accurate values of  $(b_i(t) - \bar{b}(t))^T \tilde{\mu}(t)$  so that their upper bound is lower than  $(b_{a^*(t)}(t) - \bar{b}(t))^T \mu$ , enabling the algorithm to distinguish between them and the optimal arm.

(d) Next, we show in Proposition C.3 that the probability of playing saturated arms is bounded by a function of the probability of playing unsaturated arms. The proof is a simple extension of Agrawal and Goyal (2013).

**Proposition C.3.** *Let  $C(t)$  be the set of saturated arms at time  $t$ , i.e.,  $C(t) = \{i : (b_i(t) - \bar{b}(t))^T \mu + g(T) s_{t,i}^c < (b_{a^*(t)}(t) - \bar{b}(t))^T \mu\}$ . Given any filtration  $\mathcal{F}_{t-1}$  such that  $E^{\hat{\mu}}(t)$  is true,*

$$\mathbb{P}(a(t) \in C(t) | \mathcal{F}_{t-1}) \leq \frac{1}{p} \mathbb{P}(a(t) \notin C(t) | \mathcal{F}_{t-1}) + \frac{1}{pT^2},$$

where  $p = \frac{1}{4e\sqrt{2}\sqrt{\pi}}$ .

*Proof.* Since the algorithm pulls the arm  $\operatorname{argmax}_i \{b_i(t)^T \tilde{\mu}(t)\}$ , if  $b_{a^*(t)}(t)^T \tilde{\mu}(t) > b_j(t)^T \tilde{\mu}(t)$  for every  $j \in C(t)$ , then  $a(t) \notin C(t)$ . Hence,

$$\begin{aligned} \mathbb{P}(a(t) \notin C(t) | \mathcal{F}_{t-1}) &\geq \mathbb{P}(b_{a^*(t)}(t)^T \tilde{\mu}(t) > b_j(t)^T \tilde{\mu}(t), \forall j \in C(t) | \mathcal{F}_{t-1}) \\ &= \mathbb{P}(b_{a^*(t)}^c(t)^T \tilde{\mu}(t) > b_j^c(t)^T \tilde{\mu}(t), \forall j \in C(t) | \mathcal{F}_{t-1}). \end{aligned} \quad (5)$$

If  $E^{\hat{\mu}}(t)$  is additionally true, for  $\forall j \in C(t)$ ,

$$\begin{aligned} b_j^c(t)^T \tilde{\mu}(t) &\leq b_j^c(t)^T \mu + g(T) s_{t,j}^c \quad (\because E^{\hat{\mu}}(t) \& E^{\tilde{\mu}}(t)) \\ &\leq b_{a^*(t)}^c(t)^T \mu. \quad (\because \text{definition of } C(t)) \end{aligned}$$

Therefore,

$$\begin{aligned} \mathbb{P}(b_{a^*(t)}^c(t)^T \tilde{\mu}(t) > b_j^c(t)^T \tilde{\mu}(t), \forall j \in C(t) | \mathcal{F}_{t-1}) &+ \left(1 - \mathbb{P}(E^{\hat{\mu}}(t) | \mathcal{F}_{t-1})\right) \\ &\geq \mathbb{P}(b_{a^*(t)}^c(t)^T \tilde{\mu}(t) > b_{a^*(t)}^c(t)^T \mu | \mathcal{F}_{t-1}). \end{aligned} \quad (6)$$

Given  $E^{\hat{\mu}}(t)$ ,  $|b_{a^*(t)}^c(t)^T (\hat{\mu}(t) - \mu)| \leq l(T) s_{t,a^*(t)}^c$ . Thus by Lemma A.4,

$$\begin{aligned} (6) &= \mathbb{P}\left(\frac{b_{a^*(t)}^c(t)^T (\tilde{\mu}(t) - \hat{\mu}(t))}{v s_{t,a^*(t)}^c} > \frac{b_{a^*(t)}^c(t)^T (\mu - \hat{\mu}(t))}{v s_{t,a^*(t)}^c} \middle| \mathcal{F}_{t-1}\right) \\ &\geq \mathbb{P}\left(Z(t) > \frac{l(T)}{v} \middle| \mathcal{F}_{t-1}\right) \\ &\geq \frac{1}{4\sqrt{\pi}z} \exp\left(-\frac{z^2}{2}\right) \geq p, \end{aligned} \quad (7)$$

where  $Z(t) | \mathcal{F}_{t-1} \sim \mathcal{N}(0, 1)$  and  $z = l(T)/v$ . Therefore, due to (5), (6), (7) and Proposition C.2,

$$\begin{aligned} \mathbb{P}(a(t) \notin C(t) | \mathcal{F}_{t-1}) &\geq p - \frac{1}{T^2}. \\ \Rightarrow \frac{\mathbb{P}(a(t) \in C(t) | \mathcal{F}_{t-1})}{\mathbb{P}(a(t) \notin C(t) | \mathcal{F}_{t-1}) + \frac{1}{T^2}} &\leq \frac{1}{p}. \end{aligned}$$

□

- (e) Next in Proposition C.4, we use Proposition C.3 and the definition of unsaturated arms to show that the regret can be bounded by a factor of  $s_{t,a(t)}^c$  in expectation.

**Proposition C.4.** *Given any filtration  $\mathcal{F}_{t-1}$  such that  $E^{\hat{\mu}}(t)$  is true,*

$$\mathbb{E}[\text{regret}(t)|\mathcal{F}_{t-1}] \leq \frac{5g(T)}{p} \mathbb{E}[s_{t,a(t)}^c|\mathcal{F}_{t-1}] + \frac{3g(T)}{pT^2}.$$

*Proof.* Let  $\tilde{a}(t) = \operatorname{argmin}_{i \notin C(t)} s_{t,i}^c$ . This value is determined by  $\mathcal{F}_{t-1}$ . Under both  $E^{\hat{\mu}}(t)$  and  $E^{\tilde{\mu}}(t)$ ,

$$\begin{aligned} b_{a^*(t)}^c(t)^T \mu &= b_{a^*(t)}^c(t)^T \mu - b_{\tilde{a}(t)}^c(t)^T \mu + b_{\tilde{a}(t)}^c(t)^T \mu \\ &\leq g(T) s_{t,\tilde{a}(t)}^c + b_{\tilde{a}(t)}^c(t)^T \mu \\ &\leq g(T) s_{t,\tilde{a}(t)}^c + b_{\tilde{a}(t)}^c(t)^T \tilde{\mu}(t) + g(T) s_{t,\tilde{a}(t)}^c \\ &\leq 2g(T) s_{t,\tilde{a}(t)}^c + b_{\tilde{a}(t)}^c(t)^T \tilde{\mu}(t) \\ &\leq 2g(T) s_{t,\tilde{a}(t)}^c + b_{\tilde{a}(t)}^c(t)^T \mu + g(T) s_{t,a(t)}^c \\ \Rightarrow \text{regret}(t) &\leq 2g(T) s_{t,\tilde{a}(t)}^c + g(T) s_{t,a(t)}^c, \end{aligned}$$

where the first inequality follows from the definition of unsaturated arms, the second and fourth inequalities from  $E^{\hat{\mu}}(t)$  and  $E^{\tilde{\mu}}(t)$ , and the third inequality from the action selection mechanism. Therefore, given  $\mathcal{F}_{t-1}$  such that  $E^{\hat{\mu}}(t)$  holds,

$$\begin{aligned} \mathbb{E}[\text{regret}(t)|\mathcal{F}_{t-1}] &\leq 2g(T) s_{t,\tilde{a}(t)}^c + g(T) \mathbb{E}[s_{t,a(t)}^c|\mathcal{F}_{t-1}] + 1 - \mathbb{P}(E^{\tilde{\mu}}(t)|\mathcal{F}_{t-1}) \\ &\leq 2g(T) s_{t,\tilde{a}(t)}^c + g(T) \mathbb{E}[s_{t,a(t)}^c|\mathcal{F}_{t-1}] + \frac{1}{T^2}. \end{aligned} \quad (8)$$

Here,

$$\begin{aligned} s_{t,\tilde{a}(t)}^c &= s_{t,\tilde{a}(t)}^c \{ \mathbb{P}(a(t) \in C(t)|\mathcal{F}_{t-1}) + \mathbb{P}(a(t) \notin C(t)|\mathcal{F}_{t-1}) \} \\ &\leq s_{t,\tilde{a}(t)}^c \left\{ \frac{2}{p} \mathbb{P}(a(t) \notin C(t)|\mathcal{F}_{t-1}) + \frac{1}{pT^2} \right\} \\ &= \frac{2}{p} \mathbb{E}(s_{t,\tilde{a}(t)}^c I\{a(t) \notin C(t)\}|\mathcal{F}_{t-1}) + \frac{s_{t,\tilde{a}(t)}^c}{pT^2} \\ &\leq \frac{2}{p} \mathbb{E}(s_{t,a(t)}^c I\{a(t) \notin C(t)\}|\mathcal{F}_{t-1}) + \frac{s_{t,\tilde{a}(t)}^c}{pT^2} \\ &\leq \frac{2}{p} \mathbb{E}(s_{t,a(t)}^c|\mathcal{F}_{t-1}) + \frac{1}{pT^2}, \end{aligned}$$

where the first inequality is due to Proposition C.3 and the second inequality is due to the definition of  $\tilde{a}(t)$ . Combining this result with (8), we have

$$\mathbb{E}[\text{regret}(t)|\mathcal{F}_{t-1}] \leq \frac{5g(T)}{p} \mathbb{E}(s_{t,a(t)}^c|\mathcal{F}_{t-1}) + \frac{3g(T)}{pT^2}.$$

□

- (f) Let  $M_t = \text{regret}(t)I(E^{\hat{\mu}}(t)) - \frac{5g(T)}{p} s_{t,a(t)}^c - \frac{3g(T)}{pT^2}$ . Then  $|M_t|$  is bounded by  $\frac{9g(T)}{p}$ . Also, due to Proposition C.4,  $\{M_t\}_{t=1}^T$  is a bounded super-martingale difference process with respect to the filtration  $\{\mathcal{F}_t\}_{t=1}^T$ . Hence by Azuma-Hoeffding's inequality, for any  $a \geq 0$ ,

$$\mathbb{P}\left(\sum_{t=1}^T M_t \geq a\right) \leq \exp\left(-\frac{a^2}{2\sum_{t=1}^T c_t^2}\right),$$

where  $c_t = \frac{9}{p}g(T)$ . Setting  $\exp\left(-\frac{a^2}{2\sum_{t=1}^T c_t^2}\right) = \frac{\delta}{2}$ , we have  $a = \frac{9}{p}g(T)\sqrt{2T\log(\frac{2}{\delta})}$ . Thus with probability at least  $1 - \frac{\delta}{2}$ ,

$$\sum_{t=1}^T \text{regret}(t)I(E^{\hat{\mu}}(t)) \leq \frac{5g(T)}{p} \sum_{t=1}^T s_{t,a(t)}^c + \frac{3g(T)}{pT} + \frac{9}{p}g(T)\sqrt{2T\log(\frac{2}{\delta})}. \quad (9)$$

In Proposition C.5, we show that  $\sum_{t=1}^T s_{t,a(t)}^c \leq \sqrt{2dT\log(1+T/d)}$  using Lemma A.1.

**Proposition C.5.**  $\sum_{t=1}^T s_{t,a(t)}^c \leq \sqrt{2dT\log(1+T/d)}$ .

*Proof.* Take  $X_t = b_{a(t)}(t) - \bar{b}(t)$ ,  $Q = I_d$ , and  $A(t) = \sum_{\tau=1}^{t-1} X_\tau X_\tau^T$ . Then by Jensen's inequality and Lemma A.1,

$$\begin{aligned} \sum_{t=1}^T s_{t,a(t)}^c &\leq \sqrt{T \sum_{t=1}^T \{s_{t,a(t)}^c\}^2} \quad (\because \text{Jensen's inequality}) \\ &= \sqrt{T \sum_{t=1}^T X_t^T B(t)^{-1} X_t} \\ &\leq \sqrt{T \sum_{t=1}^T X_t^T \{Q + A(t)\}^{-1} X_t} \quad (\because B(t) \succ Q + A(t)) \\ &\leq \sqrt{2T\log\left(\frac{\det(Q + A(T+1))}{\det(Q)}\right)} \quad (\because \text{Lemma A.1}) \\ &\leq \sqrt{2dT\log\left(1 + \frac{T}{d}\right)}. \quad (\because \text{determinant-trace inequality.}) \end{aligned}$$

□

Due to (9), Proposition C.5 and the definitions of  $p$  and  $g(T)$ , we have with probability at least  $1 - \frac{\delta}{2}$ ,

$$\sum_{t=1}^T \text{regret}(t)I(E^{\hat{\mu}}(t)) \leq O\left(d^{3/2}\sqrt{T}\sqrt{\log(Td)\log(T/\delta)}(\sqrt{\log(1+T/d)} + \sqrt{\log(1/\delta)})\right).$$

Since  $E^{\hat{\mu}}(t)$  holds for all  $t$  with probability at least  $1 - \frac{\delta}{2}$  (Theorem C.1),  $\text{regret}(t)I(E^{\hat{\mu}}(t)) = \text{regret}(t)$  for all  $t$  with probability at least  $1 - \frac{\delta}{2}$ . Hence, with probability at least  $1 - \delta$ ,

$$R(T) \leq O\left(d^{3/2}\sqrt{T}\sqrt{\log(Td)\log(T/\delta)}(\sqrt{\log(1+T/d)} + \sqrt{\log(1/\delta)})\right).$$

## References

- Abbasi-Yadkori, Y., Pál, D. and Szepesvári, C. Improved algorithms for linear stochastic bandits. In *Advances in Neural Information Processing Systems*, pp. 2312–2320, 2011.
- Abramowitz, M. and Stegun, I.A. *Handbook of mathematical functions with formulas, graphs, and mathematical tables*. Washington, DC: National Bureau of Standards, 1964.
- Agrawal, S. and Goyal, N. Thompson sampling for contextual bandits with linear payoffs. In *Proceedings of the 30th International Conference on Machine Learning*, pp. 127–135, 2013.
- Bercu, B. and Touati, A. Exponential inequalities for self-normalized martingales with applications. *The Annals of Applied Probability*, 18(5):1848–1869, 2008.
- de la Peña, V. H., Klass, M. J. and Lai, T. L. Theory and applications of multivariate self-normalized processes. *Stochastic Processes and their Applications*, 119(12):4210–4227, 2009.
